# Supplementary material for: Gadolinium Enhancement in Intracranial Atherosclerotic Plaque and Ischemic Stroke: A Systematic Review and Meta‐Analysis
Source: PubMed Central journal article supplement — J Am Heart Assoc. 2016 Aug 15;5(8):e003816. doi: 10.1161/JAHA.116.003816 (PMC5015301; doi:10.1161/jaha.116.003816), 2016-08-15
Supplement: JAH3-5-e003816-s001.pdf [file JAH3-5-e003816-s001.pdf]

# **SUPPLEMENTAL MATERIAL**

## **Supplemental Methods: Data S1**

### **Search Methodology Details**

**Ovid MEDLINE(R) In-Process & Other Non-Indexed Citations and Ovid MEDLINE(R) 1946 to Present - December 21, 2015**

1. exp Stroke/
2. Stroke\$.tw.
3. cerebrovascular.tw.
4. exp Brain Ischemia/
5. ((brain or vascular or lacunar or venous or cerebral or isch?emi\$) adj2 (accident\$ or infarct\$ or event\$ or attack\$)).tw.
6. (cva or cvas).tw.
7. exp Magnetic Resonance Imaging/
8. (magnetic resonance or MR or MRI or MRIs or MRA or MRDTI).tw.
9. Contrast Media/
10. Imaging, Three-Dimensional/
11. exp Image Enhancement/
12. Gadolinium DTPA/
13. (vessel adj3 imag\$).tw.
14. (Gadolinium or Gd?DTPA or Magnograf or Magnevist or gadopentetate).tw.
15. (contrast or enhance\$ or 3?D or Dimension\$).tw.
16. Intracranial Arteriosclerosis/
17. Plaque, Atherosclerotic/
18. (LRNC or ((athero\$ or steno\$ or occlus\$ or ulcer\$ or plaque\$ or intraplaque or h?emorrhag\$ or IPH or narrow\$ or obstruct\$ or constrict\$ or bruit\$ or lipid or fibrous or culprit or lesion\$) adj3 (intracranial or cerebr\$ or brain))).tw.
19. or/1-6
20. or/7-8
21. or/9-15
22. or/16-18
23. and/19-22
24. (animals not (humans and animals)).sh.
25. 23 not 24

**The Cochrane Library Wiley - December 21, 2015**

- #1 MeSH descriptor: [Stroke] explode all trees
- #2 stroke
- #3 cerebrovascular

- #4 MeSH descriptor: [Brain Ischemia] explode all trees
- #5 ((brain or vascular or lacunar or venous or cerebral or isch\*emi\*) near/2 (accident\* or infarct\* or event\* or attack\*))
- #6 cva or cvas
- #7 MeSH descriptor: [Magnetic Resonance Imaging] explode all trees
- #8 magnetic resonance or MR or MRI or MRIs or MRA or MRDTI
- #9 MeSH descriptor: [Contrast Media] this term only
- #10 MeSH descriptor: [Imaging, Three-Dimensional] this term only
- #11 MeSH descriptor: [Image Enhancement] explode all trees
- #12 MeSH descriptor: [Gadolinium DTPA] this term only
- #13 vessel near/3 imag\*
- #14 Gadolinium or Gd\*DTPA or Magnograf or Magnevist or gadopentetate
- #15 contrast or enhance\* or 3\*D or Dimension\*
- #16 MeSH descriptor: [Intracranial Arteriosclerosis] this term only
- #17 MeSH descriptor: [Plaque, Atherosclerotic] this term only
- #18 (LRNC or ((athero\* or steno\* or occlus\* or ulcer\* or plaque\* or intraplaque or h\*emorrhag\* or IPH or narrow\* or obstruct\* or constrict\* or bruit\* or lipid or fibrous or culprit or lesion\*) near/3 (intracranial or cerebr\* or brain)))
- #19 #1 or #2 or #3 or #4 or #5 or #6
- #20 #7 or #8
- #21 #9 or #10 or #11 or #12 or #13 or #14 or #15
- #22 #16 or #17 or #18
- #23 #19 and #20 and #21 and #22

**Embase (Ovid) 1974 to January 31, 2014- December 21, 2015**

1. exp cerebrovascular accident/
2. Stroke\$.tw.
3. cerebrovascular.tw.
4. exp brain ischemia/
5. ((brain or vascular or lacunar or venous or cerebral or isch?emi\$) adj2 (accident\$ or infarct\$ or event\$ or attack\$)).tw.
6. (cva or cvas).tw.
7. exp nuclear magnetic resonance imaging/
8. (magnetic resonance or MR or MRI or MRIs or MRA or MRDTI).tw.
9. exp contrast medium/
10. three dimensional imaging/
11. image enhancement/
12. image quality/
13. digital subtraction angiography/
14. radiography/
15. computer assisted tomography/
16. positron emission tomography/

17. single photon emission computer tomography/
18. gadolinium pentetate/
19. (vessel adj3 imag\$).tw.
20. (Gadolinium or Gd?DTPA or Magnograf or Magnevist or gadopentetate).tw.
21. (contrast or enhance\$ or 3?D or Dimension\$).tw.
22. brain atherosclerosis/
23. atherosclerotic plaque/
24. (LRNC or ((athero\$ or steno\$ or occlus\$ or ulcer\$ or plaque\$ or intraplaque or h?emorrhag\$ or IPH or narrow\$ or obstruct\$ or constrict\$ or bruit\$ or lipid or fibrous or culprit or lesion\$) adj3 (intracranial or cerebr\$ or brain))).tw.
25. or/1-6
26. or/7-8
27. or/9-21
28. or/22-24
29. and/25-28
30. ((animal or nonhuman) not (human and (animal or nonhuman))).de.
31. 29 not 30

### **Risk of Bias Questions**

1. Was the study sample prospectively selected to minimize the risk of selection bias?
2. Were the inclusion and exclusion criteria adequately described?
3. Was the study's primary objective to assess whether enhancement was associated with ischemic presentations?
4. Were the investigators blinded to the location of infarction during vessel wall enhancement detection?
5. Did more than one investigator assess for the presence of vessel enhancement?
6. Was a measure of interreader reproducibility for enhancement detection reported?
7. Did more than one investigator adjudicated culprit lesion detection?
8. Were culprit and nonculprit lesions matched in terms of vessel stenosis severity?
